# Supplementary material for: Rolling-Circle-Amplification-Assisted DNA Biosensors for Sensitive and Specific Detection of Hypochlorous Acid and Myeloperoxidase
Source: MDPI journal article supplement (doi:10.3390/chemistry5020098), 2023-06-18
Supplement: s1 [file s1]

Archive with 1 entries (1 files):
- chemistry-2442419-supplementary.pdf
