# Supplementary material for: Rolling-Circle-Amplification-Assisted DNA Biosensors for Sensitive and Specific Detection of Hypochlorous Acid and Myeloperoxidase
Source: MDPI journal article supplement (doi:10.3390/chemistry5020098), 2023-06-18
Supplement: s1 [file s1 › chemistry-2442419-supplementary.pdf]

Supporting Information for

**Rolling circle amplification-assisted DNA biosensors for  
sensitive and specific detection of hypochlorous acid and  
myeloperoxidase**

Bo Liu <sup>1,†</sup>, Jia-Yi Ma <sup>1,†</sup>, Jing Wang <sup>2</sup>, Dong-Xia Wang <sup>1</sup>, An-Na Tang <sup>1</sup> and De-Ming  
Kong <sup>1,\*</sup>

<sup>1</sup> State Key Laboratory of Medicinal Chemical Biology, Tianjin Key Laboratory of Biosensing and Molecular Recognition, Research Centre for Analytical Sciences, College of Chemistry, Nankai University, Tianjin 300071, China; [nankai\\_lb@163.com](mailto:nankai_lb@163.com) (B.L.); [2120170751@mail.nankai.edu.cn](mailto:2120170751@mail.nankai.edu.cn) (D.-X.W.); [tanganna@nankai.edu.cn](mailto:tanganna@nankai.edu.cn) (A.-N.T.)

<sup>2</sup> School of Medical Laboratory, College of Medical Technology, Tianjin Medical University, Guangdong Road, Tianjin 300203, China; [wj822@mail.nankai.edu.cn](mailto:wj822@mail.nankai.edu.cn)

\* Correspondence: [kongdem@nankai.edu.cn](mailto:kongdem@nankai.edu.cn)

† These authors contributed equally to this work.

## Table of contents:

|                                                                                  |    |
|----------------------------------------------------------------------------------|----|
| S1. Experimental Section .....                                                   | 3  |
| S1.1 Materials and reagents.....                                                 | 3  |
| S1.2 Apparatus .....                                                             | 3  |
| S1.3 Preparation of ROS solutions.....                                           | 4  |
| S1.4 Electrophoresis characterization .....                                      | 4  |
| S1.4.1 The condition of Primer-S cleavage.....                                   | 4  |
| S1.4.2 The hybridization condition of Primer-S and Padlock.....                  | 5  |
| S1.4.3 The condition of RCA reaction .....                                       | 5  |
| S1.5 MPO inhibition assay .....                                                  | 5  |
| S2. HClO-sensing system .....                                                    | 6  |
| S2.1 Optimization of Primer-S concentration .....                                | 6  |
| S2.2 Optimization of Padlock concentration.....                                  | 6  |
| S2.3 Optimization of Phi29 DNA polymerase amount .....                           | 7  |
| S2.4 Optimization of the reaction time for HClO-induced Primer-S cleavage .....  | 7  |
| S2.5 Optimization of RCA reaction time .....                                     | 8  |
| S2.6 Comparison of our HClO biosensor with reported ones .....                   | 8  |
| S2.7 HClO detection in real sample .....                                         | 8  |
| S3. MPO-sensing system.....                                                      | 9  |
| S3.1 Optimization of H <sub>2</sub> O <sub>2</sub> concentration .....           | 9  |
| S3.2 Optimization of the reaction time for MPO-dependent Primer-S cleavage ..... | 9  |
| S3.3 Comparison of our MPO biosensor with reported ones .....                    | 10 |
| S3.4 MPO detection in real sample .....                                          | 10 |

## **S1. Experimental Section**

### **S1.1 Materials and reagents**

Phi29 DNA polymerase, T4 DNA ligase, 10 × phi29 DNA polymerase reaction buffer (500 mM Tris-HCl, 100 mM MgCl<sub>2</sub>, 100 mM (NH<sub>4</sub>)<sub>2</sub>SO<sub>4</sub>, 40 mM DTT, pH 7.5), and 10 × T4 DNA ligase reaction buffer (500 mM Tris-HCl, 100 mM MgCl<sub>2</sub>, 100 mM DTT, 10 mM ATP, pH 7.5) were purchased from New England Biolabs (Beijing, China). NaClO were purchased from Alfa Aesar (China). H<sub>2</sub>O<sub>2</sub>, L-cysteine, glucose and dopamine were purchased from Aladdin (Shanghai, China). Myeloperoxidase (MPO, human neutrophil) was purchased from Athens Research & Technology. Deoxyribonucleoside 5'-triphosphate mixture (dNTPs) was obtained from Tiangen Biotech (Beijing) Co., Ltd. Thioflavin T (ThT) was obtained from Sigma. 4-aminobenzoic acid hydrazide (4-ABAH), lipopolysaccharide (LPS), glutathione reductase (GSR) and diethyl pyrocarbonate water (DEPC) were purchased from Shanghai Yuanye Bio-Technology Co., Ltd. Salicyl hydroxamic acid (SHA) and horseradish peroxidase (HRP) were purchased from Macklin. Phorbol 12-myristate 13-acetate (PMA) was purchased from MultiSciences (Lianke) Biotech Co., Ltd. Hypoxanthine, catalase (from bovine liver) and healthy human serum were purchased from Solarbio. Xanthine oxidase (XOD) was purchased from Nanjing Duly Biotech Co., Ltd. Tert-butyl hydroperoxide (TBHP) was purchased from Energy Chemical. MPO commercial kit was purchased from Shanghai Beibo Biotechnology Co., Ltd. Ultrapure water (resistance  $\geq 18.2 \text{ M}\Omega \cdot \text{cm}$ ) was used throughout the experiments. All chemical reagents were of analytical grade and used without further purification.

### **S1.2 Apparatus**

UV-Vis spectral measurements were performed on an Agilent Technologies Cary 60 UV/Vis spectrometer. pH values of corresponding solutions were measured by a Mettler-Toledo Delta 320 pH meter. All fluorescence measurements were carried out

on a Shimadzu RF-5301 PC fluorescence spectrometer (Shimadzu Ltd., Japan). Excitation and emission slits were set at 3.0 and 3.0 nm, respectively. Gel electrophoresis result was observed using a Gel Documentation System (Huifuxingye, Beijing, China).

### **S1.3 Preparation of ROS solutions**

The concentrations of NaClO and H<sub>2</sub>O<sub>2</sub> were measured by UV-Vis spectroscopy, based on their molar extinction coefficients at 290 nm (350 M<sup>-1</sup>·cm<sup>-1</sup>) and 230 nm (81 M<sup>-1</sup>·cm<sup>-1</sup>), respectively. Superoxide (O<sub>2</sub><sup>-</sup>) was prepared with XOD, catalase and hypoxanthine according to the literature methods.<sup>1</sup> TBHP, LPS and PMA were prepared by diluting the stock solutions.

1. Srikun, D.; Miller, E. W.; Domaille, D. W.; Chang, C. J., An ICT-based approach to ratiometric fluorescence imaging of hydrogen peroxide produced in living cells. J. Am. Chem. Soc. 2008, 130 (14), 4596-4597.

### **S1.4 Electrophoresis characterization**

#### **S1.4.1 Site-specific cleavage of Primer-S**

For HClO assay, 20 µL of samples containing 1 × hybridization buffer, 2.5 µM DNA (FAM-modified Primer-S, prepared in advance through incubation at 95 °C for 5 min and then at 25 °C for 30 min) and 5 µM HClO were prepared and incubated at 37 °C for 1 h. The samples were analyzed by 24% denatured PAGE in 0.5 × TBE buffer (44.5 mM Tris-boric acid, 1 mM EDTA, pH 8.3) at 180 V for 60 min, following by photographing with gel recording system based on the fluorescence of FAM under UV irradiation.

For MPO assay, 20 µL of samples containing 1 × NEBuffer2.1, 2.5 µM DNA (FAM-modified Primer-S, prepared in advance through incubation at 95 °C for 5 min and then at 25 °C for 30 min), 20 µM H<sub>2</sub>O<sub>2</sub> and 1 µg/mL MPO were prepared and incubated at 37 °C for 15 min. The samples were analyzed by 24% denatured PAGE in

0.5 × TBE buffer, same as above.

#### **S1.4.2 Hybridization between Primer-S and Padlock**

20 µL of samples containing 1 × hybridization buffer, 5 µL 10 µM Primer-S (prepared in advance through incubation at 95 °C for 5 min and then at 25 °C for 30 min) and 5 µM HClO (or 10 µM H<sub>2</sub>O<sub>2</sub> and 300 ng/mL MPO) were prepared and incubated at 37 °C for 30 min. After that, 5 µL Padlock (10 µM) and 1 × T4 DNA ligase reaction buffer were added, and the resultant reaction mixture were incubated at 16 °C for 2 h for the cyclization of Padlock. Then, 20 µL above solution was mixed with 2 µL 6 × Super GelRed Prestain loading buffer and analyzed by 10% non-denaturing PAGE in 0.5 × TBE buffer at 120 V for 50 min, following by photographing with gel recording system.

#### **S1.4.3 RCA reaction**

20 µL of samples, obtained from 100 µL RCA reaction systems in HClO or MPO detection, were mixed with 2 µL 6 × Super GelRed Prestain loading buffer and then analyzed by 10% non-denaturing PAGE in 0.5 × TBE buffer at 120 V for 50 min, following by photographing with gel recording system.

#### **S1.5 MPO inhibitor assay**

The experiment was the same as that for MPO detection, except that the mixture of 300 ng/mL MPO and different concentrations of 4-ABAH, which was pre-incubated at 37 °C for 10 min, was added in the sensing system instead of MPO.

The relative activity (RA) of MPO was calculated according to the following equation:

$$RA = (F_i - F_0)/(F_t - F_0) \times 100\%$$

Where  $F_0$ ,  $F_t$ , and  $F_i$  represent the fluorescence intensity without MPO, with 300 ng/mL MPO, with 300 ng/mL MPO and different concentrations of 4-ABAH.

## S2. HClO-sensing system

### S2.1 Optimization of Primer-S concentration

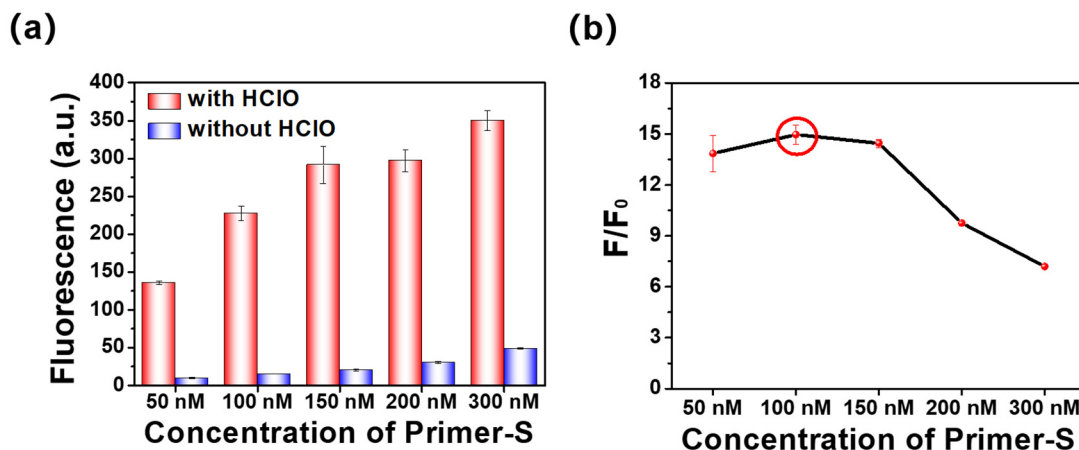

**Figure S1** Variance of (a) fluorescence intensity and (b) signal-to-noise ratio ( $F/F_0$ ) with the Primer-S concentration.  $F$  and  $F_0$  are the fluorescence intensities at 485 nm in the presence and absence of HClO, respectively.  $[\text{HClO}] = 3 \mu\text{M}$ .

### S2.2 Optimization of Padlock concentration

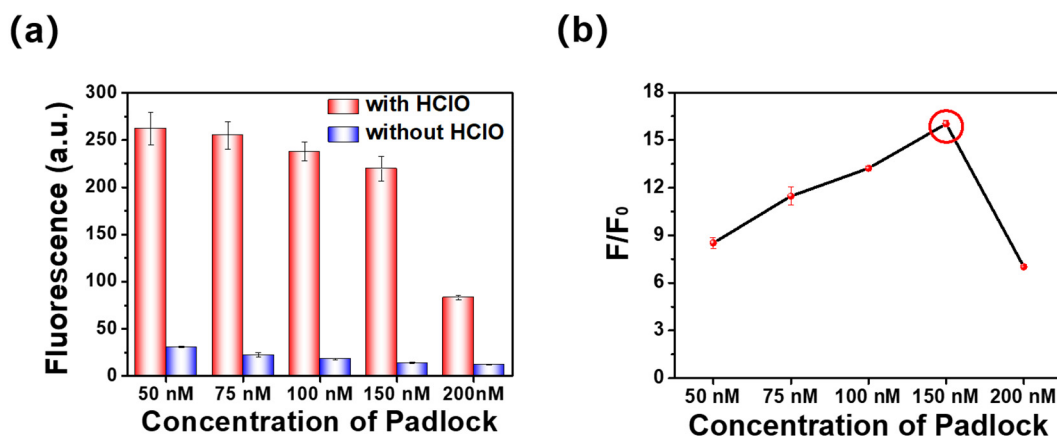

**Figure S2** Variance of (a) fluorescence intensity and (b) signal-to-noise ratio ( $F/F_0$ ) with the Padlock concentration.  $F$  and  $F_0$  are the fluorescence intensities at 485 nm in the presence and absence of HClO, respectively.  $[\text{HClO}] = 3 \mu\text{M}$ .

### S2.3 Optimization of Phi29 DNA polymerase amount

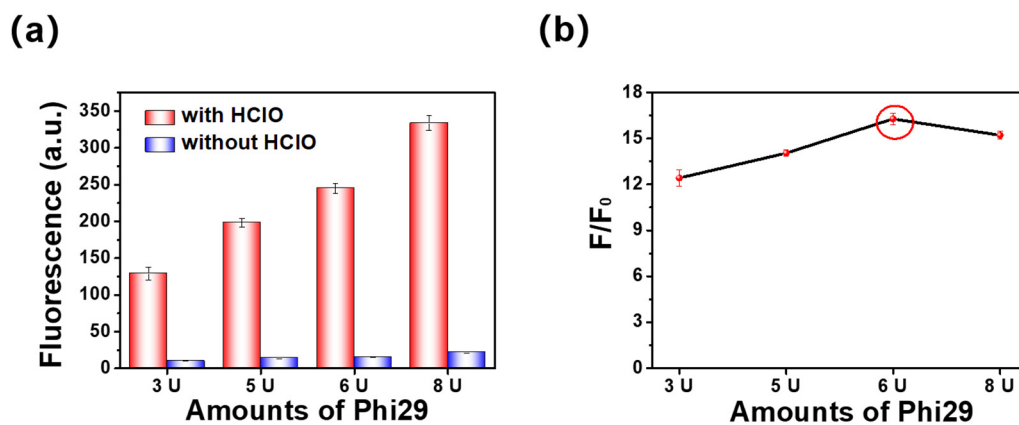

**Figure S3** Variance of (a) fluorescence intensity and (b) signal-to-noise ratio ( $F/F_0$ ) with the Phi29 DNA polymerase amount.  $F$  and  $F_0$  are the fluorescence intensities at 485 nm in the presence and absence of HClO, respectively. [HClO] = 3  $\mu$ M.

### S2.4 Optimization of the reaction time for HClO-induced Primer-S cleavage

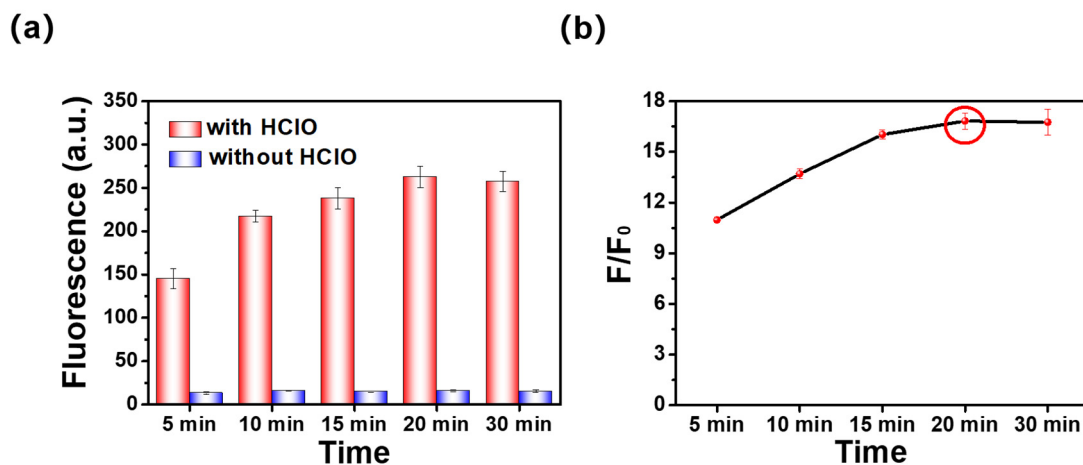

**Figure S4** Variance of (a) fluorescence intensity and (b) signal-to-noise ratio ( $F/F_0$ ) with the reaction time for HClO-induced Primer-S cleavage.  $F$  and  $F_0$  are the fluorescence intensities at 485 nm in the presence and absence of HClO, respectively. [HClO] = 3  $\mu$ M.

## S2.5 Optimization of RCA reaction time

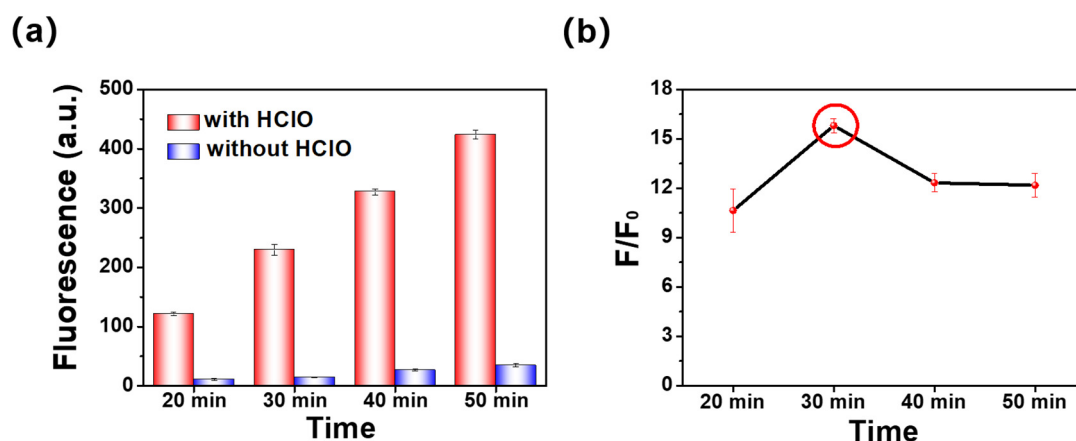

**Figure S5** Variance of (a) fluorescence intensity and (b) signal-to-noise ratio ( $F/F_0$ ) with the RCA reaction time.  $F$  and  $F_0$  are the fluorescence intensities at 485 nm in the presence and absence of HClO, respectively.  $[\text{HClO}] = 3 \mu\text{M}$ .

## S2.6 Comparison of our HClO biosensor with reported ones

**Table S1.** Comparison of several HClO detection methods.

| Method                         | Limit of detection | Liner range           | Reference |
|--------------------------------|--------------------|-----------------------|-----------|
| CD/CCM@ZIF-8                   | 67 nM              | 0.1-50 $\mu\text{M}$  | 29        |
| PC-UCNPs sensor                | 66.88 nM           | 0.1-5.0 $\mu\text{M}$ | 19        |
| MOF-based nanoprobe            | 6.7 $\mu\text{M}$  | 15-180 $\mu\text{M}$  | 11        |
| NIR fluorescent probe Cy7-NphS | 0.62 $\mu\text{M}$ | 0-3.84 $\mu\text{M}$  | 30        |
| TDN-HCR-based HClO sensor      | 0.8 nM             | 2.5-200 nM            | 24        |
| CRISPR/Cas12a-based biosensor  | 0.33 $\mu\text{M}$ | 1-5 $\mu\text{M}$     | 31        |
| RCA-assisted HClO biosensor    | 1.67 nM            | 5-5000 nM             | This work |

## S2.7 HClO detection in real sample

**Table S2.** Recovery of HClO from human serum sample.

| Spiked HClO ( $\mu\text{M}$ ) | Detected HClO ( $\mu\text{M}$ ) | Recovery (%), n=3 |
|-------------------------------|---------------------------------|-------------------|
| 0.00                          | ND <sup>a</sup>                 | -                 |
| 1.00                          | 1.02 $\pm$ 0.03                 | 102.17 $\pm$ 2.79 |
| 3.00                          | 2.88 $\pm$ 0.08                 | 96.11 $\pm$ 2.81  |
| 5.00                          | 4.67 $\pm$ 0.07                 | 93.43 $\pm$ 1.49  |

<sup>a</sup>ND, not detected.

Serum was subjected to a 100-fold dilution before analysis.

### S3. MPO-sensing system

#### S3.1 Optimization of H<sub>2</sub>O<sub>2</sub> concentration

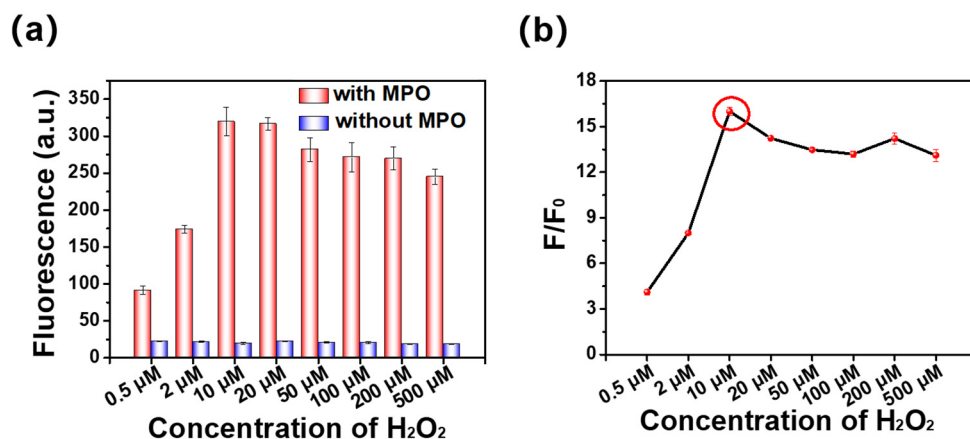

**Figure S6** Variance of (a) fluorescence intensity and (b) signal-to-noise ratio ( $F/F_0$ ) with the H<sub>2</sub>O<sub>2</sub> concentration.  $F$  and  $F_0$  are the fluorescence intensities at 485 nm in the presence and absence of MPO, respectively. [MPO] = 300 ng/mL.

#### S3.2 Optimization of the reaction time for MPO-dependent Primer-S cleavage

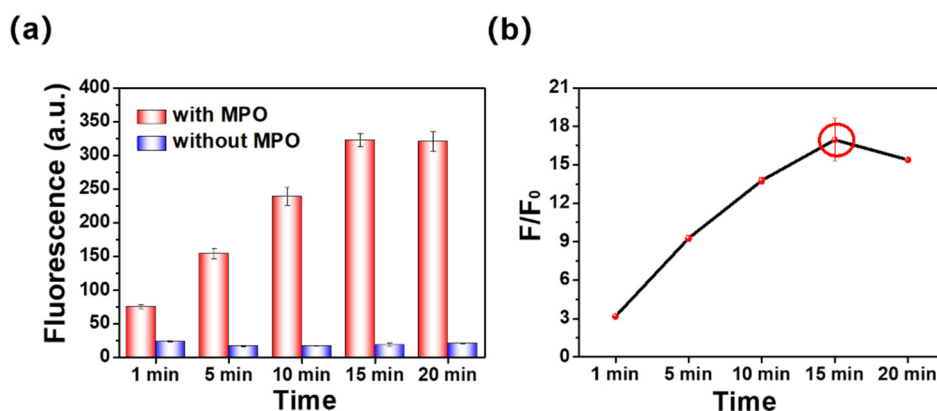

**Figure S7** Variance of (a) fluorescence intensity and (b) signal-to-noise ratio ( $F/F_0$ ) with the reaction time for MPO-dependent Primer-S cleavage.  $F$  and  $F_0$  are the fluorescence intensities at 485 nm in the presence and absence of MPO, respectively. [MPO] = 300 ng/mL.

### S3.3 Comparison of our MPO biosensor with reported ones

**Table S3.** Comparison of several MPO detection methods.

| Method                                     | Limit of detection<br>(ng/mL) | Linear range<br>(ng/mL) | Reference |
|--------------------------------------------|-------------------------------|-------------------------|-----------|
| PC-UCNPs sensor                            | 2.44                          | 10-200                  | 19        |
| TDN-HCR-based HClO sensor                  | 0.6                           | 2-25                    | 24        |
| Chronoamperometric magneto<br>immunosensor | 0.4                           | 0.9-60                  | 34        |
| Chemosensor 7-HCCO                         | 5                             | 0-120                   | 35        |
| Near-infrared probe FD-301                 | 0.22                          | 50-250                  | 20        |
| MHC-HCR amplification                      | 8.35                          | 25-2500                 | 23        |
| CRISPR/Cas12a-based biosensor              | 0.67                          | 2-600                   | 31        |
| RCA-assisted HClO biosensor                | 0.33                          | 1-400                   | This work |

### S3.4 MPO detection in real sample

**Table S4.** Recovery of MPO from human serum sample.

| Spiked MPO<br>(ng/mL) | Detected MPO<br>(ng/mL) | Recovery (%), n=3 | Kit assay<br>(ng/mL) |
|-----------------------|-------------------------|-------------------|----------------------|
| 0.00                  | ND <sup>a</sup>         | -                 | -                    |
| 60.00                 | 61.43 ± 0.79            | 107.39 ± 1.31     | 54.57                |
| 150.00                | 141.88 ± 2.16           | 94.59 ± 1.44      | 144.54               |
| 300.00                | 290.37 ± 11.02          | 96.79 ± 3.67      | 308.26               |

<sup>a</sup>ND, not detected.

Serum was subjected to a 100-fold dilution before analysis.
